# Supplementary material for: Identification and Characterization of Chemotherapy-Resistant High-Risk Neuroblastoma Persister Cells
Source: PubMed Central journal article supplement — Cancer Discov. 2024 Jul 31;14(12):2387–406. doi: 10.1158/2159-8290.CD-24-0046 (PMC11609622; doi:10.1158/2159-8290.cd-24-0046), 2024-07-31
Supplement: cd-24-0046_figure_s3_suppsf3.pdf [file cd-24-0046_figure_s3_suppsf3.pdf]

### Supplementary Figure S3

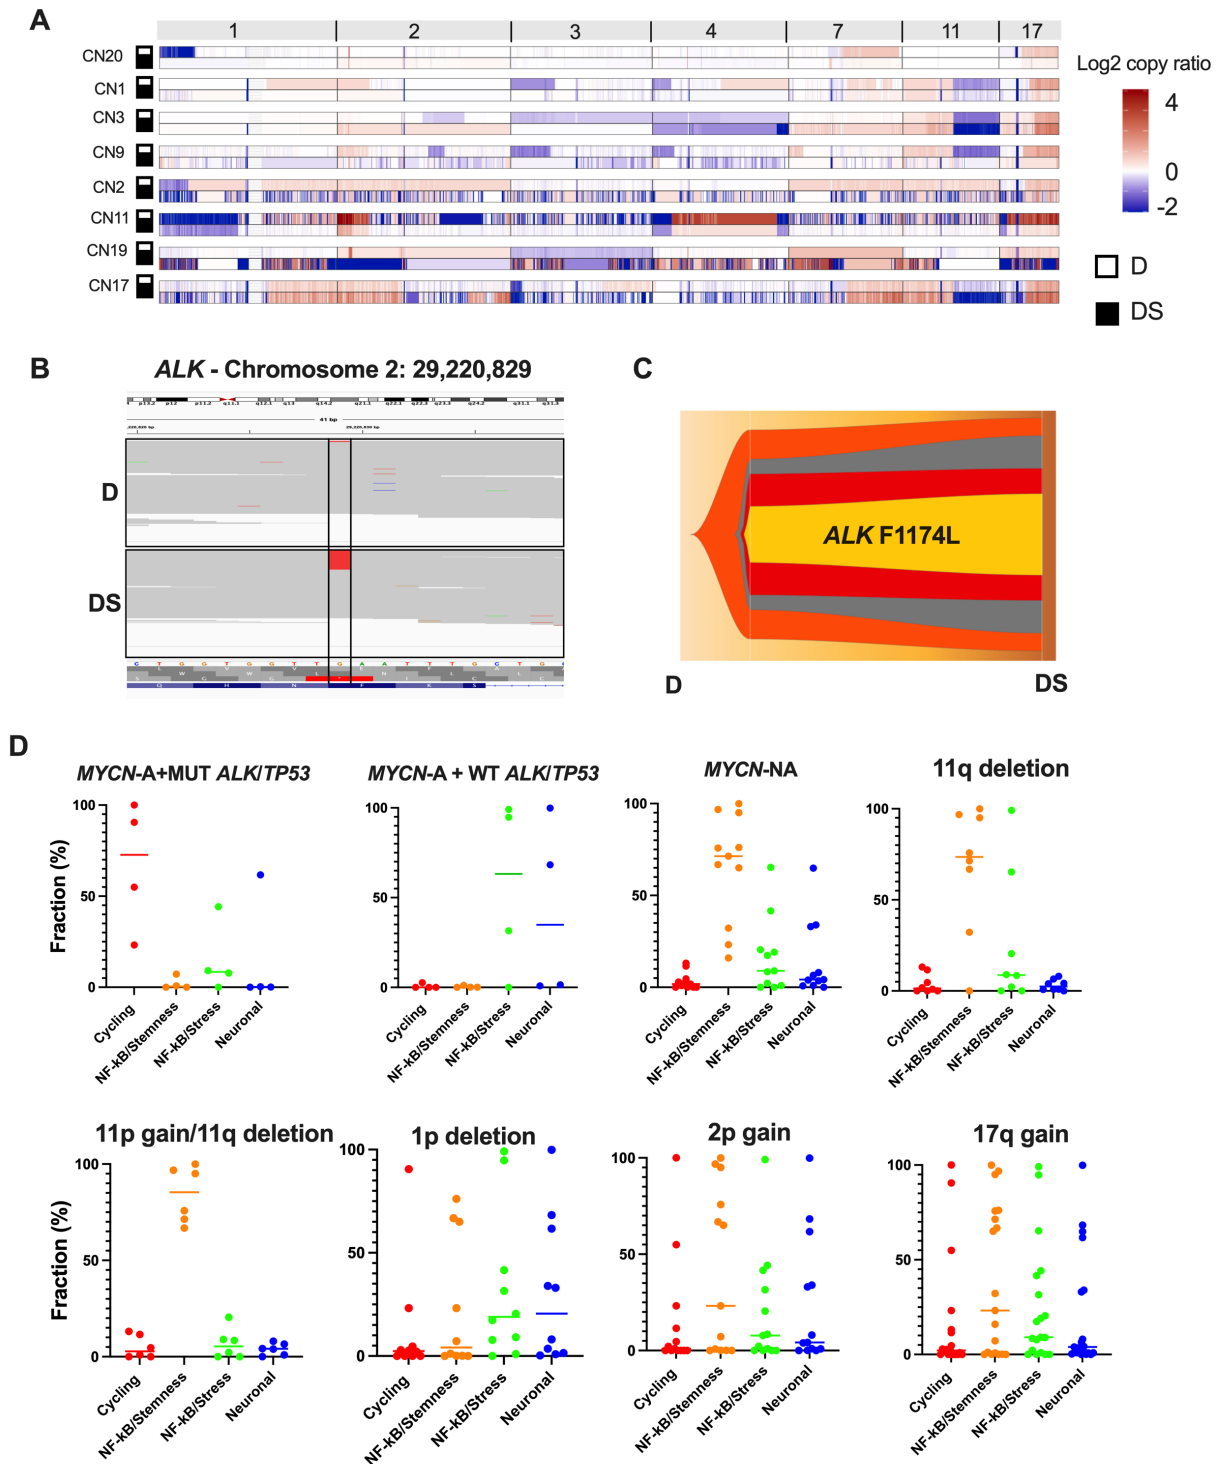

**Supplementary Figure S3. A.** Heatmap of log<sub>2</sub> copy ratio of chromosomes 1,2,3,4,7,11,17 for 8 pairs with low tumor purity at diagnosis (D) and definitive surgery (DS) resulting in indeterminate

CNV calling. Red – gain, blue -loss. **B.** Integrated Genome Viewer (IGV) screenshot for DNA at position 29,220,829 on chromosome 2, where the *ALK* gene is located, of a tumor obtained at diagnosis (D) and definitive surgery (DS) from patient CN14. Two reads (red) are aligned to T instead of G at diagnosis (VAF=1.5%) whereas multiple reads (red) aligned to T at definitive surgery (VAF=30%). **C.** Fishplot of the mutations percent from a tumor obtained from patient CN14 at diagnosis and definitive surgery showing clonal evolution of *ALK* subclone. **D.** Percent of persisters subtypes in 19 surgical specimens for typical neuroblastoma genetic alterations at diagnosis (CHOP cohort), A- Amplified, NA- Non-Amplified, MUT – mutated, WT – wild type.
