# Supplementary material for: Identification and Characterization of Chemotherapy-Resistant High-Risk Neuroblastoma Persister Cells
Source: PubMed Central journal article supplement — Cancer Discov. 2024 Jul 31;14(12):2387–406. doi: 10.1158/2159-8290.CD-24-0046 (PMC11609622; doi:10.1158/2159-8290.cd-24-0046), 2024-07-31
Supplement: cd-24-0046_figure_s6_suppsf6.pdf [file cd-24-0046_figure_s6_suppsf6.pdf]

Supplementary Figure S6

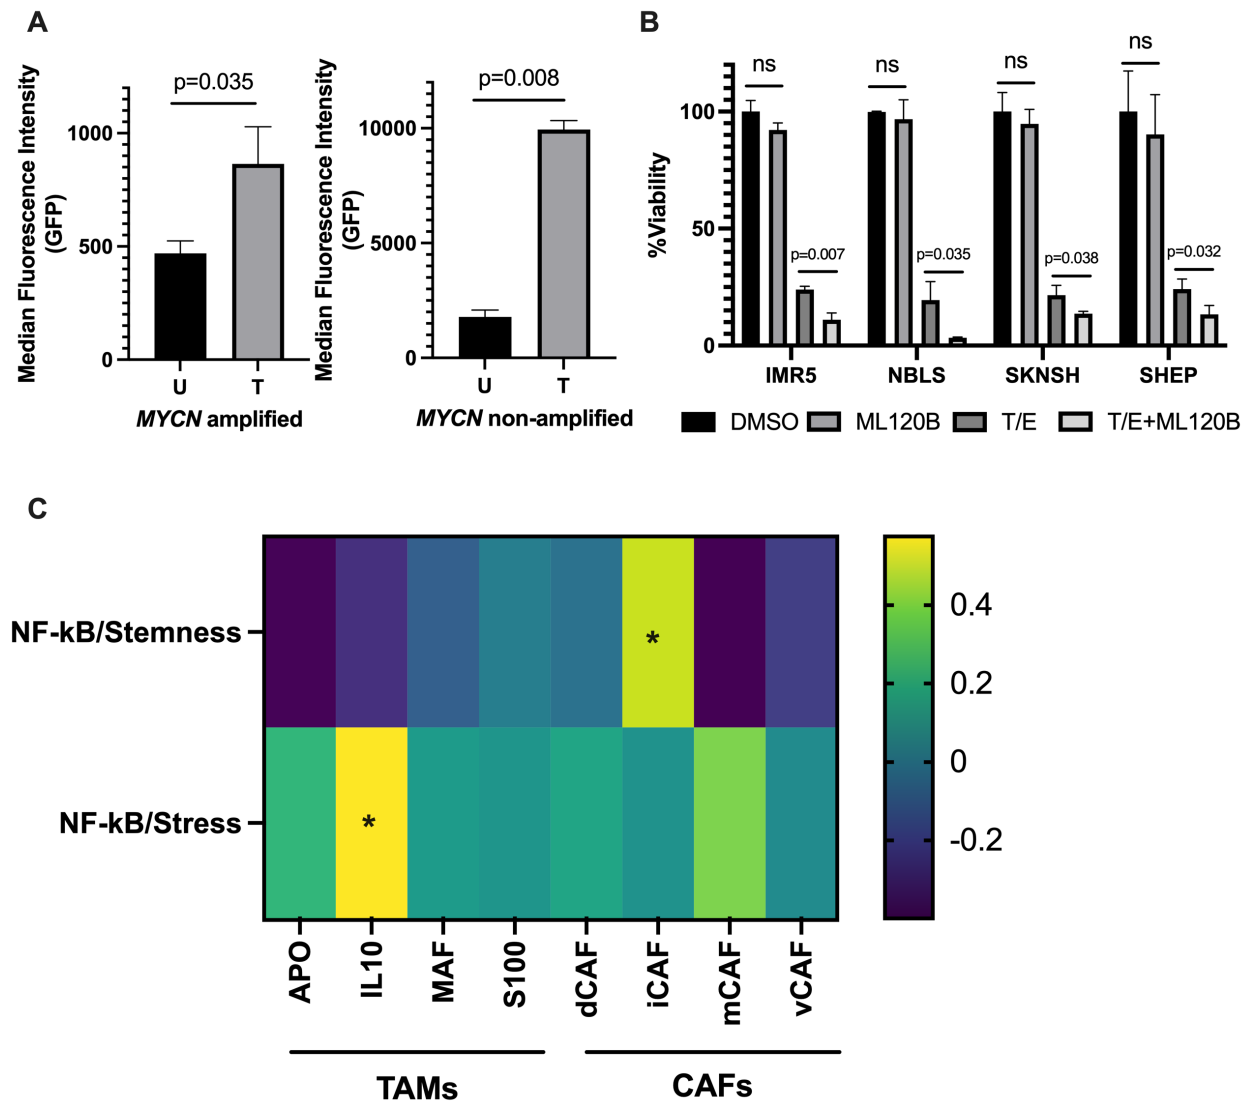

**Supplementary Figure S6. A.** Box plots of median fluorescence intensity (MFI) of two *MYCN* amplified (IMR5 and LAN5) and non-amplified (SKNSH and SHEP) cell lines, transduced with GFP reporter under NFkB consensus before (U) and after treatment with topotecan followed by etoposide (T). **B.** Violin plots of cell viability of 4 neuroblastoma cell lines treated with control (DMSO), ML120B at 40µM, chemotherapy (topotecan followed by etoposide at IC<sub>70</sub>, T/E) and chemotherapy (T/E) +ML120B at 40µM. **C.** Heatmap of Pearson correlations between the relative changes in NF-kB /Stemness or relative changes in NFkB /Stress and relative changes in TAMs and CAFs subtypes at definitive surgery .\*,  $p<0.05$ ; \*\*,  $p<0.01$ ; \*\*\*,  $p<0.001$ ; ns, not significant
