# Supplementary figures and images for: Identification and Characterization of Chemotherapy-Resistant High-Risk Neuroblastoma Persister Cells
Source: PubMed Central journal article supplement — Cancer Discov. 2024 Jul 31;14(12):2387–406. doi: 10.1158/2159-8290.CD-24-0046 (PMC11609622; doi:10.1158/2159-8290.cd-24-0046), 2024-07-31

# Supplementary Figure S5

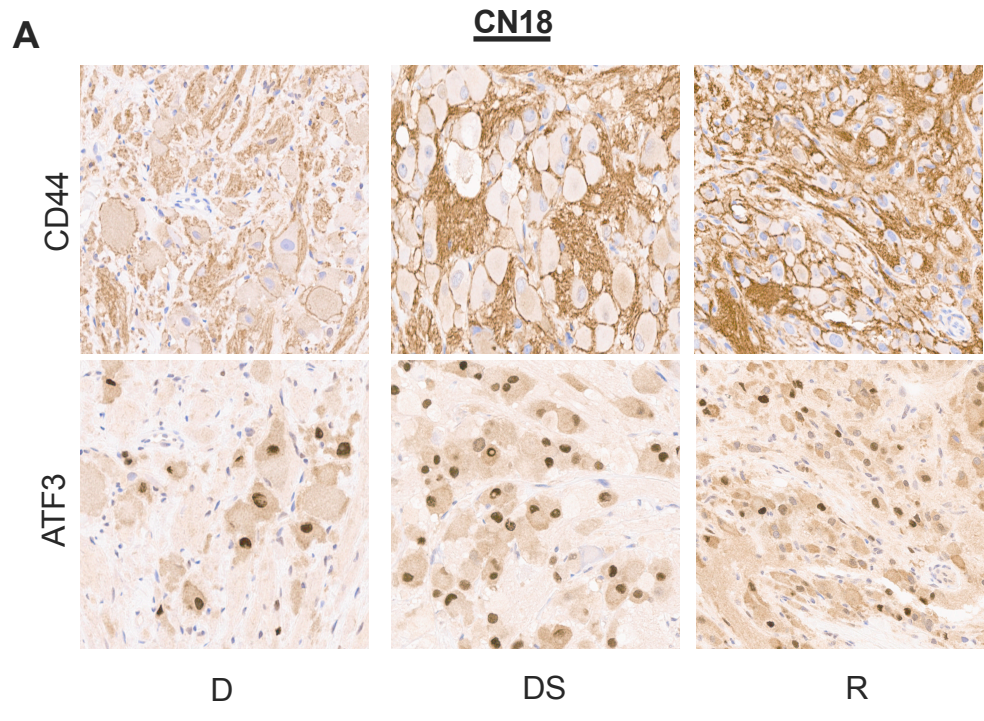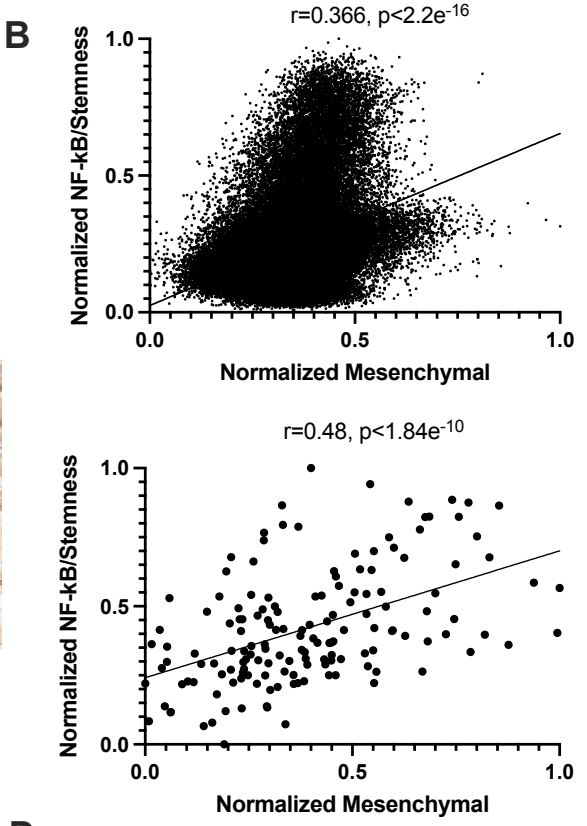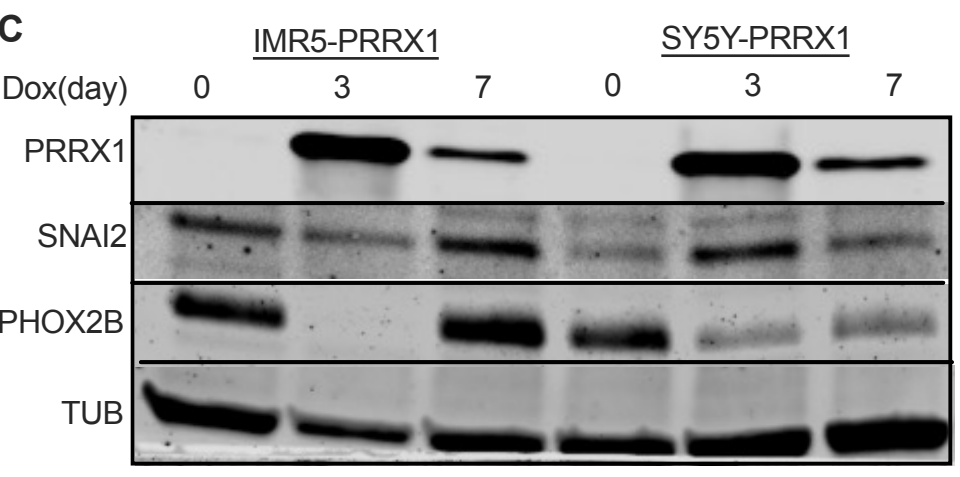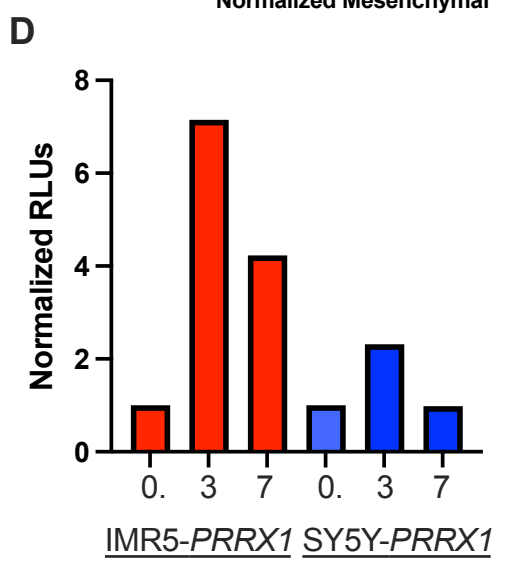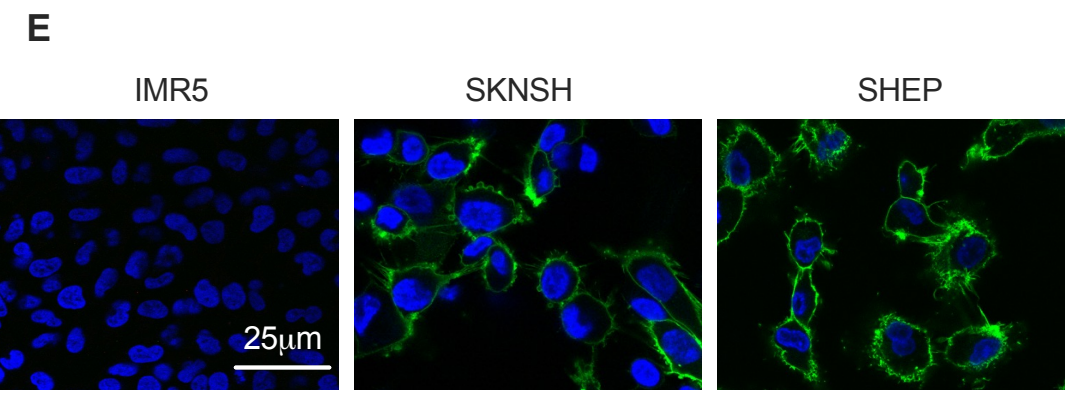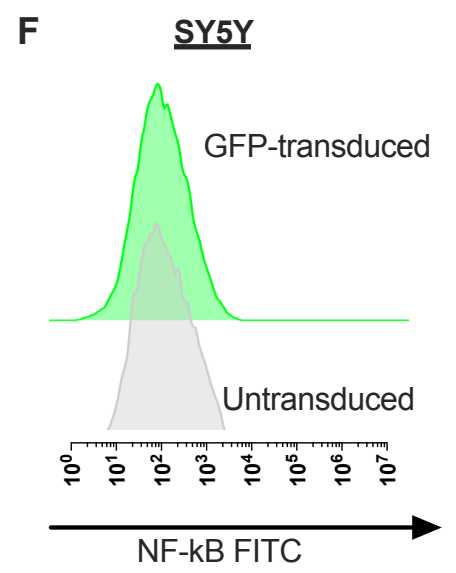

Supplement: cd-24-0046_figure_s5_suppsf5.pdf [file cd-24-0046_figure_s5_suppsf5.pdf]
